# Supplementary material
Source: PubMed Central journal article supplement (PMC1420802)
Supplement: nar_34_6_1721__2.pdf [file nar_34_6_1721__2.pdf]

## Supplemental Document S2

### Physicochemical Data of Mithramycin SDK (SDK)

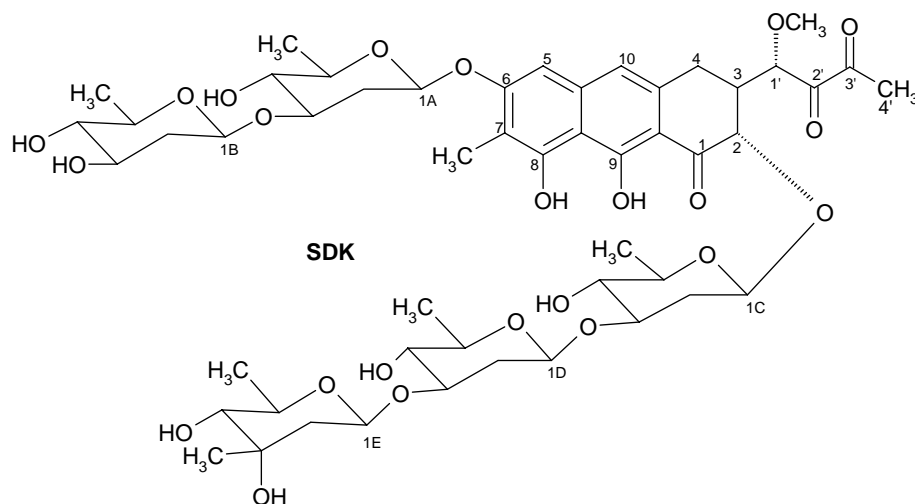

#### Mithramycin SDK

Molecular formula = 1052 (C<sub>51</sub>H<sub>72</sub>O<sub>23</sub>), Positive mode ESI-MS: m/z 1075.4 (M+Na, HR: calc. for C<sub>51</sub>H<sub>72</sub>O<sub>23</sub>Na: m/z 1075.4464, found: 1075.4492) Negative mode ESI-MS: m/z 1051.4 (M-H), IR (KBr):  $\nu$  = 3433 (OH), 2983 (CH), 2935 (CH), 2886 (CH), 1712 (C=O), 1703 (C=O), 1600 (C=O), 1521(C=C), 1371, 1164, 1068 cm<sup>-1</sup>. UV/Vis (Methanol):  $\lambda_{\max}(\epsilon)$  = 431 (9200), 317 (6400), 282 (55300) nm.

#### <sup>1</sup>H-NMR (400 MHz, pyridine-d<sub>5</sub>, TMS) and <sup>13</sup>C-NMR (100.6 MHz, pyridine-d<sub>5</sub>, TMS) data of Mithramycin SDK.

| Position            | $\delta$ <sup>1</sup> H (ppm) | Multiplicity<br><i>J</i> (Hz) | $\delta$ <sup>13</sup> C (ppm) | Important <sup>3</sup> <i>J</i><br>HMBC |
|---------------------|-------------------------------|-------------------------------|--------------------------------|-----------------------------------------|
| <b>Aglycon</b>      |                               |                               |                                |                                         |
| 1                   | -                             | -                             | 204.3                          | -                                       |
| 2                   | 4.87                          | d (12)                        | 78.0                           | 1C, 4, 9a                               |
| 3                   | 3.09                          | dddd (12, 12, 3, 1)           | 43.6                           | 1, 4a, 2'                               |
| 4 <sub>ax</sub>     | 3.27                          | dd (16, 12)                   | 28.4                           | 2, 10, 9a, 1'                           |
| 4 <sub>eq</sub>     | 2.85                          | dd (16, 3)                    |                                | 2, 9a, 1'                               |
| 4a                  | -                             | -                             | 136.6                          | -                                       |
| 5                   | 7.09                          | S                             | 100.9                          | 7, 8a, 10                               |
| 6                   | -                             | -                             | 160.3                          | -                                       |
| 7                   | -                             | -                             | 111.5                          | -                                       |
| 7-CH <sub>3</sub>   | 2.44                          | S                             | 9.4                            | 6, 8                                    |
| 8                   | -                             | -                             | 157.4                          | -                                       |
| 8a                  | -                             | -                             | 109.6                          | -                                       |
| 9                   | -                             | -                             | 166.8                          | -                                       |
| 9a                  | -                             | -                             | 109.6                          | -                                       |
| 10                  | 6.70                          | br. S                         | 117.4                          | 5, 8a, 9a, 4                            |
| 10a                 | -                             | -                             | 139.5                          | -                                       |
| 1'                  | 5.49                          | d (1)                         | 83.5                           | 2, 4, -OCH <sub>3</sub> ,               |
| 1'-OCH <sub>3</sub> | 3.72                          | S                             | 59.7                           | 1'                                      |

|                                 |      |                  |       |        |
|---------------------------------|------|------------------|-------|--------|
| 2'                              | -    | -                | 198.6 | -      |
| 3'                              | -    | -                | 199.5 | -      |
| 4'                              | 2.42 | S                | 26.4  | 2'     |
| Sugar A ( $\alpha$ -D-olivose)  |      |                  |       |        |
| 1A                              | 5.62 | dd (10, 2)       | 98.4  | 6      |
| 2A <sub>ax</sub>                | 2.16 | ddd (12, 12, 10) | 37.4  |        |
| 2A <sub>eq</sub>                | 2.51 | m (overlap)      |       |        |
| 3A                              | 4.54 | ddd (12, 9, 5)   | 81.3  | 1B     |
| 4A                              | 3.43 | dd (9, 9)        | 75.4  |        |
| 5A                              | 3.55 | m (overlap)      | 72.6  |        |
| 6A                              | 1.56 | d (6)            | 18.0  |        |
| Sugar B ( $\alpha$ -D-olivose)  |      |                  |       |        |
| 1B                              | 5.56 | dd (10, 2)       | 100.2 | 3A     |
| 2B <sub>ax</sub>                | 2.04 | ddd (12, 12, 10) | 40.0  |        |
| 2B <sub>eq</sub>                | 2.46 | m (overlap)      |       |        |
| 3B                              | 4.44 | m (overlap)      | 71.4  |        |
| 4B                              | 3.33 | dd (9, 9)        | 77.6  |        |
| 5B                              | 3.41 | dq (9, 6)        | 72.6  |        |
| 6B                              | 1.45 | d (6)            | 17.7  |        |
| Sugar C ( $\alpha$ -D-olivose)  |      |                  |       |        |
| 1C                              | 5.39 | dd (10, 2)       | 100.8 | 2      |
| 2C <sub>ax</sub>                | 1.80 | ddd (12, 12, 10) | 37.9  |        |
| 2C <sub>eq</sub>                | 2.95 | ddd (12, 5, 2)   |       |        |
| 3C                              | 4.09 | m (overlap)      | 81.8  | 1D     |
| 4C                              | 3.47 | dd (9, 9)        | 75.7  |        |
| 5C                              | 3.65 | dq (9, 6)        | 72.6  |        |
| 6C                              | 1.38 | d (6)            | 17.9  |        |
| Sugar D ( $\alpha$ -D-oliose)   |      |                  |       |        |
| 1D                              | 4.74 | dd (10, 2)       | 100.3 | 3C     |
| 2D <sub>ax</sub>                | 1.79 | ddd (12, 12, 10) | 32.5  |        |
| 2D <sub>eq</sub>                | 2.43 | ddd (12, 5, 2)   |       |        |
| 3D                              | 3.98 | ddd (12, 5, 3)   | 77.3  | 1E     |
| 4D                              | 3.53 | br. S            | 68.9  |        |
| 5D                              | 3.63 | m (overlap)      | 71.0  |        |
| 6D                              | 1.39 | d (6)            | 16.5  |        |
| Sugar E ( $\alpha$ -D-macarose) |      |                  |       |        |
| 1E                              | 5.34 | dd (9.5, 2)      | 97.9  | 3D     |
| 2E <sub>ax</sub>                | 2.34 | dd (13, 9.5)     | 44.3  |        |
| 2E <sub>eq</sub>                | 2.46 | dd (13, 2)       |       |        |
| 3E                              | -    | -                | 70.7  |        |
| 3E-CH <sub>3</sub>              | 1.93 | S                | 27.0  | 2E, 4E |
| 4E                              | 3.09 | d (9)            | 76.8  |        |
| 5E                              | 4.65 | m (overlap)      | 71.0  |        |
| 6E                              | 1.57 | d (6)            | 17.7  |        |

\* Assignments were initially based on comparison with MTM and SK, but were also independently confirmed by 2D NMR experiments, including H,H-COSY, TOCSY and HMBC; br. = broad; overlap = overlapped by other signals or solvent signals
