# Supplementary material
Source: PubMed Central journal article supplement (PMC1420802)
Supplement: nar_34_6_1721__3.pdf [file nar_34_6_1721__3.pdf]

## Supplemental Document S3

### Primers and PCR conditions

| Gene   | Forward primer               | Reverse primer             | PCR cycles                                          |
|--------|------------------------------|----------------------------|-----------------------------------------------------|
| c-myc  | GGTCTTCCCCTACCCTCTCAACGA     | GGCAGCAGGATAGTCCTCCGAGT    | 15s@94°C<br>30s@56°C<br>60s@72°C<br>26 cycles       |
| vegf   | ATGAACTTTCTGCTGTCTTGGGTGCATT | TCACCGCCTCGGCTTGTACAT      | 15s @ 94°C<br>30s @ 59°C<br>60s @ 72°C<br>28 cycles |
| bcl-xl | GAAGGGACTGAATCGGAGATGGAGAC   | AGAGTGGATGGTCAGTGTCTGGTCAT | 15s@94°C<br>30s@55°C<br>30s@72°C<br>30 cycles       |
| c-src  | GTCTGACTTCGACAACGCCAAG       | CCCCTGAGAAAAGTCCAGCAAA     | 15s@94°C<br>30s@55°C<br>60s @ 72°C<br>30 cycles     |
| h-tert | TGAACTTGCGGAAGACAGTG         | GGGTTCTTCCAAACTGTCTG       | 15s@94°C<br>30s @ 59°C<br>60s @ 72°C<br>30 cycles   |
| col1 1 | AGGGTGAGACAGGCGAACAG         | GCCCCAGGGTGTCCATA          | 60s@94°C<br>30s @ 59°C<br>45s @ 72°C<br>30 cycles   |
| gapdh  | GGGTGTGGGCAAGGTCATCC         | TCCACCACCCTGTTGCTGTA       | 15s@94°C<br>30s @ 60°C<br>45s @ 72°C<br>30 cycles   |
