# Supplementary material
Source: PubMed Central journal article supplement (PMC1420802)
Supplement: nar_34_6_1721__4.pdf [file nar_34_6_1721__4.pdf]

## Supplemental Document S4

## Excel Dataset 1 - SDK down-regulated genes

| Probe Set ID | Gene Symbol | d.value    | q.value    | p.value  | R.fold    | fold change |
|--------------|-------------|------------|------------|----------|-----------|-------------|
| 203739_at    | ZNF217      | -3.3966423 | 0.01692722 | 9.04E-06 | 0.1321153 | 7.569146041 |
| 232797_at    | ---         | -2.3783294 | 0.01703643 | 1.00E-03 | 0.1486546 | 6.727003403 |
| 204011_at    | SPRY2       | -2.5834622 | 0.01692722 | 4.16E-04 | 0.1545323 | 6.471139043 |
| 201773_at    | ADNP        | -2.675577  | 0.01692722 | 2.71E-04 | 0.1604221 | 6.233555102 |
| 204602_at    | DKK1        | -2.6451493 | 0.01692722 | 2.89E-04 | 0.1621968 | 6.165349748 |
| 202431_s_at  | MYC         | -2.433317  | 0.01703643 | 8.32E-04 | 0.1632136 | 6.126940402 |
| 212558_at    | SPRY1       | -2.5453129 | 0.01692722 | 5.52E-04 | 0.167535  | 5.96890202  |
| 201166_s_at  | PUM1        | -2.5712729 | 0.01692722 | 4.52E-04 | 0.1729298 | 5.782693324 |
| 204491_at    | PDE4D       | -2.861701  | 0.01692722 | 1.18E-04 | 0.1740227 | 5.746376766 |
| 202521_at    | CTCF        | -2.6243959 | 0.01692722 | 3.35E-04 | 0.1740377 | 5.745881496 |
| 212614_at    | ARID5B      | -3.0119496 | 0.01692722 | 7.24E-05 | 0.1779867 | 5.61839733  |
| 241769_at    | ---         | -2.5282955 | 0.01692722 | 6.06E-04 | 0.1802986 | 5.546354769 |
| 202097_at    | NUP153      | -2.7089128 | 0.01692722 | 2.44E-04 | 0.1838139 | 5.440284984 |
| 209033_s_at  | DYRK1A      | -2.6283217 | 0.01692722 | 3.17E-04 | 0.1840752 | 5.432562344 |
| 212124_at    | RAI17       | -2.8056929 | 0.01692722 | 1.36E-04 | 0.1862577 | 5.368905554 |
| 217996_at    | PHLDA1      | -2.5174732 | 0.01692722 | 6.51E-04 | 0.1866114 | 5.358729424 |
| 202149_at    | NEDD9       | -3.2364996 | 0.01692722 | 1.81E-05 | 0.1922852 | 5.200608263 |
| 200798_x_at  | MCL1        | -2.5635961 | 0.01692722 | 4.97E-04 | 0.1924107 | 5.197216163 |
| 218696_at    | EIF2AK3     | -2.7134902 | 0.01692722 | 2.35E-04 | 0.1935827 | 5.165750865 |
| 212458_at    | SPRE2D      | -2.4939897 | 0.01703643 | 7.24E-04 | 0.1946745 | 5.136779599 |
| 204094_s_at  | TSC22D2     | -2.7895371 | 0.01692722 | 1.54E-04 | 0.1954308 | 5.116900714 |
| 218733_at    | RNF184      | -2.5509089 | 0.01692722 | 5.34E-04 | 0.1964672 | 5.089908137 |
| 218041_x_at  | SLC38A2     | -2.309755  | 0.01703643 | 1.28E-03 | 0.1992375 | 5.019135454 |
| 207826_s_at  | ID3         | -2.2834698 | 0.01703643 | 1.41E-03 | 0.2003425 | 4.991452138 |
| 224692_at    | PPP1R15B    | -2.4345384 | 0.01703643 | 8.23E-04 | 0.2005619 | 4.985991856 |
| 221517_s_at  | CRSP6       | -2.62554   | 0.01692722 | 3.26E-04 | 0.2029753 | 4.926707831 |
| 213390_at    | C19orf7     | -2.5864045 | 0.01692722 | 4.07E-04 | 0.2030281 | 4.925426579 |
| 203313_s_at  | TGIF        | -2.9205355 | 0.01692722 | 9.04E-05 | 0.2031499 | 4.922473504 |
| 201493_s_at  | PUM2        | -2.5054858 | 0.01703643 | 6.96E-04 | 0.2047158 | 4.88482081  |
| 203957_at    | E2F6        | -2.6011878 | 0.01692722 | 3.89E-04 | 0.2092359 | 4.779294567 |
| 217742_s_at  | WAC         | -2.553117  | 0.01692722 | 5.16E-04 | 0.2104552 | 4.751605092 |
| 204258_at    | CHD1        | -1.692707  | 0.01750708 | 7.09E-03 | 0.2117486 | 4.722581401 |
| 221489_s_at  | SPRY4       | -2.3943237 | 0.01703643 | 9.50E-04 | 0.2123302 | 4.709645637 |
| 202393_s_at  | KLF10       | -2.7169686 | 0.01692722 | 2.17E-04 | 0.2131193 | 4.692207604 |
| 221230_s_at  | ARID4B      | -1.6318719 | 0.01764668 | 7.84E-03 | 0.2141124 | 4.670444122 |
| 212441_at    | KIAA0232    | -2.478809  | 0.01703643 | 7.42E-04 | 0.2151915 | 4.647023697 |
| 212267_at    | KIAA0261    | -2.356505  | 0.01703643 | 1.08E-03 | 0.2175778 | 4.596057135 |
| 218478_s_at  | ZCCHC8      | -2.4132491 | 0.01703643 | 8.95E-04 | 0.2190382 | 4.565413704 |
| 203250_at    | RBM16       | -2.7158347 | 0.01692722 | 2.26E-04 | 0.2202015 | 4.541295132 |
| 209431_s_at  | ZNF278      | -2.5375638 | 0.01692722 | 5.79E-04 | 0.2213106 | 4.518536392 |
| 213694_at    | RSNB1       | -2.6119965 | 0.01692722 | 3.71E-04 | 0.2237642 | 4.468990124 |
| 224769_at    | ---         | -2.3966664 | 0.01703643 | 9.32E-04 | 0.2241013 | 4.462267733 |
| 220924_s_at  | SLC38A2     | -2.1244143 | 0.01726289 | 2.62E-03 | 0.2265304 | 4.41441855  |
| 222982_x_at  | SLC38A2     | -2.0793588 | 0.01726289 | 2.93E-03 | 0.2267476 | 4.410190009 |
| 200768_s_at  | MAT2A       | -2.5188155 | 0.01692722 | 6.42E-04 | 0.2274277 | 4.397001772 |
| 227335_at    | C20orf158   | -2.3449041 | 0.01703643 | 1.16E-03 | 0.2282641 | 4.380890381 |
| 224315_at    | DDX20       | -2.5098737 | 0.01692722 | 6.69E-04 | 0.2286696 | 4.373121744 |
| 202657_s_at  | SERTAD2     | -2.6216963 | 0.01692722 | 3.44E-04 | 0.2286923 | 4.372687668 |
| 218263_s_at  | LOC58486    | -2.2107812 | 0.01715192 | 1.94E-03 | 0.2305707 | 4.33706451  |
| 226360_at    | ZNRF3       | -2.4103456 | 0.01703643 | 9.14E-04 | 0.2339505 | 4.274408475 |
| 202146_at    | IFRD1       | -3.0243306 | 0.01692722 | 6.33E-05 | 0.2340597 | 4.27241426  |
| 201170_s_at  | BHLHB2      | -2.2655116 | 0.01710084 | 1.57E-03 | 0.2345882 | 4.262789006 |
| 202798_at    | SEC24B      | -2.599237  | 0.01692722 | 3.98E-04 | 0.2348893 | 4.257324621 |
| 202912_at    | ADM         | -2.1970655 | 0.01715192 | 2.06E-03 | 0.2355673 | 4.245071366 |
| 228347_at    | SIX1        | -2.3395983 | 0.01703643 | 1.18E-03 | 0.2359211 | 4.238705228 |
| 209501_at    | CDR2        | -2.7894474 | 0.01692722 | 1.63E-04 | 0.2360278 | 4.236789056 |
| 221763_at    | JMJD1C      | -1.3459198 | 0.01864307 | 1.38E-02 | 0.2373952 | 4.212385086 |
| 207147_at    | DLX2        | -2.5319686 | 0.01692722 | 5.88E-04 | 0.2382163 | 4.197865553 |
| 210512_s_at  | VEGF        | -2.4974036 | 0.01703643 | 7.05E-04 | 0.2385404 | 4.192161999 |
| 226547_at    | MYST3       | -2.6573341 | 0.01692722 | 2.80E-04 | 0.2391203 | 4.181995422 |
| 230078_at    | KIAA1961    | -2.1820199 | 0.01720934 | 2.21E-03 | 0.2426386 | 4.121355794 |
| 224570_s_at  | IRF2BP2     | -2.0752562 | 0.01726289 | 2.97E-03 | 0.2429477 | 4.116112233 |
| 208937_s_at  | ID1         | -2.5487339 | 0.01692722 | 5.43E-04 | 0.2435473 | 4.105978592 |
| 223331_s_at  | DDX20       | -2.5312964 | 0.01692722 | 5.97E-04 | 0.2435646 | 4.105686951 |
| 235791_x_at  | CHD1        | -2.0118696 | 0.01726353 | 3.55E-03 | 0.2436986 | 4.1034294   |
| 218917_s_at  | ARID1A      | -2.376568  | 0.01703643 | 1.01E-03 | 0.2445488 | 4.08916339  |
| 202724_s_at  | FOXO1A      | -3.0501021 | 0.01692722 | 5.43E-05 | 0.2468564 | 4.050938116 |
| 222390_at    | WAC         | -2.564401  | 0.01692722 | 4.79E-04 | 0.2473463 | 4.042914731 |
| 214965_at    | MGC26885    | -2.0997727 | 0.01726289 | 2.74E-03 | 0.2480436 | 4.031549292 |
| 226479_at    | KBTB6       | -2.15642   | 0.01726289 | 2.37E-03 | 0.2487256 | 4.020494875 |
| 223297_at    | MGC4268     | -2.2179049 | 0.01715192 | 1.89E-03 | 0.2487327 | 4.020380111 |
| 200796_s_at  | MCL1        | -2.7270931 | 0.01692722 | 2.08E-04 | 0.2502645 | 3.995772473 |
| 210275_s_at  | ZA20D2      | -2.383542  | 0.01703643 | 9.68E-04 | 0.2513691 | 3.97821371  |
| 228776_at    | GJA7        | -2.2484984 | 0.01710084 | 1.66E-03 | 0.2516733 | 3.973405204 |
| 242918_at    | NASP        | -2.5649032 | 0.01692722 | 4.70E-04 | 0.2529357 | 3.953573972 |
| 219433_at    | BCOR        | -2.1849401 | 0.01720934 | 2.19E-03 | 0.2538414 | 3.939467715 |
| 228698_at    | SOX7        | -2.3546045 | 0.01703643 | 1.09E-03 | 0.255255  | 3.917650976 |
| 210836_x_at  | PDE4D       | -2.8654444 | 0.01692722 | 1.09E-04 | 0.2556218 | 3.912029412 |
| 202221_s_at  | EP300       | -2.886973  | 0.01692722 | 9.95E-05 | 0.2559664 | 3.906762763 |
| 228046_at    | LOC152485   | -2.2419207 | 0.01710084 | 1.69E-03 | 0.2561898 | 3.903356027 |
| 212501_at    | CEBPB       | -2.2046095 | 0.01715192 | 2.00E-03 | 0.2562496 | 3.902445116 |
| 225687_at    | C20orf129   | -2.3079762 | 0.01703643 | 1.28E-03 | 0.2573443 | 3.885844761 |
| 236251_at    | ---         | -2.2763605 | 0.01710084 | 1.47E-03 | 0.2575746 | 3.882370389 |
| 222623_s_at  | ZNF639      | -2.2070417 | 0.01715192 | 1.96E-03 | 0.2579726 | 3.87638067  |
| 203706_s_at  | FZD7        | -2.2957712 | 0.01703643 | 1.37E-03 | 0.2598452 | 3.848445151 |
| 235165_at    | PARDB6      | -2.2193767 | 0.01715192 | 1.87E-03 | 0.2613495 | 3.826293909 |
| 236610_at    | PDE4D       | -1.7485455 | 0.01747098 | 6.37E-03 | 0.2615432 | 3.82346014  |
| 203044_at    | CHSY1       | -2.5514636 | 0.01692722 | 5.25E-04 | 0.2619071 | 3.818147733 |
| 202160_at    | CREBBP      | -2.5610249 | 0.01692722 | 5.07E-04 | 0.2623952 | 3.811045324 |
| 226837_at    | SPRE2D      | -2.2722371 | 0.01710084 | 1.50E-03 | 0.2624054 | 3.810897184 |
| 222630_at    | FLJ12994    | -2.3718083 | 0.01703643 | 1.03E-03 | 0.2624516 | 3.810226343 |
| 224956_at    | 182-FIP     | -2.2776802 | 0.01710084 | 1.46E-03 | 0.2626332 | 3.807591729 |
| 225308_s_at  | TANC        | -2.2373679 | 0.01710084 | 1.75E-03 | 0.2631102 | 3.800688837 |
| 203992_s_at  | UTX         | -3.1140375 | 0.01692722 | 4.52E-05 | 0.2631453 | 3.800181877 |
| 210053_at    | TAF5        | -2.6808742 | 0.01692722 | 2.62E-04 | 0.2634484 | 3.79580973  |
| 225183_at    | PROO149     | -2.5705366 | 0.01692722 | 4.61E-04 | 0.2637078 | 3.792075926 |
| 212966_at    | HIC2        | -2.7402846 | 0.01692722 | 1.90E-04 | 0.2640277 | 3.787481389 |
| 218761_at    | RNF111      | -2.4208506 | 0.01703643 | 8.50E-04 | 0.2641691 | 3.78545409  |
| 202599_s_at  | NRIP1       | -1.7126513 | 0.01750455 | 6.85E-03 | 0.2643101 | 3.783434685 |

|             |               |            |            |          |           |             |
|-------------|---------------|------------|------------|----------|-----------|-------------|
| 212885_at   | MPHOSPH10     | -1.4058609 | 0.01835383 | 1.21E-02 | 0.2653427 | 3.76871118  |
| 203704_s_at | RREB1         | -2.2927811 | 0.01703643 | 1.37E-03 | 0.2656625 | 3.764174469 |
| 200666_s_at | DNAJB1        | -2.2693283 | 0.01710084 | 1.55E-03 | 0.2657549 | 3.762856708 |
| 200797_s_at | MCL1          | -2.2997644 | 0.01703643 | 1.33E-03 | 0.2676261 | 3.736556337 |
| 225572_at   | CREB1         | -2.1546226 | 0.01726289 | 2.39E-03 | 0.2677144 | 3.735323912 |
| 201417_at   | SOX4          | -2.456246  | 0.01703643 | 8.05E-04 | 0.2681027 | 3.729913947 |
| 212533_at   | WEF1          | -2.3271116 | 0.01703643 | 1.21E-03 | 0.2682061 | 3.728475974 |
| 225455_at   | STAF42        | -2.1621117 | 0.01726289 | 2.34E-03 | 0.268378  | 3.726087831 |
| 212597_s_at | HMG2L1        | -2.5266228 | 0.01692722 | 6.15E-04 | 0.2687706 | 3.720645041 |
| 224571_at   | IRF2BP2       | -2.3043577 | 0.01703643 | 1.31E-03 | 0.2698015 | 3.706428615 |
| 228373_at   | PROO149       | -2.2759292 | 0.01710084 | 1.47E-03 | 0.2705751 | 3.695831582 |
| 226143_at   | RAI1          | -2.0337769 | 0.01726353 | 3.36E-03 | 0.2712421 | 3.686743319 |
| 209510_at   | RNF139        | -2.456397  | 0.01703643 | 7.96E-04 | 0.2732752 | 3.659314859 |
| 217803_at   | GOLPH3        | -2.4706831 | 0.01703643 | 7.51E-04 | 0.2736305 | 3.654563362 |
| 202654_x_at | ---           | -2.1621702 | 0.01726289 | 2.33E-03 | 0.2737022 | 3.653606    |
| 240452_at   | GSPT1         | -2.4668517 | 0.01703643 | 7.78E-04 | 0.2749909 | 3.636483971 |
| 225649_s_at | STK35         | -2.2011411 | 0.01715192 | 2.05E-03 | 0.2752249 | 3.633392182 |
| 210837_s_at | PDE4D         | -2.6143892 | 0.01692722 | 3.62E-04 | 0.2752871 | 3.632571232 |
| 212264_s_at | KIAA0261      | -2.4627689 | 0.01703643 | 7.87E-04 | 0.2753811 | 3.631331271 |
| 211063_s_at | NCK1          | -2.6190156 | 0.01692722 | 3.53E-04 | 0.2767867 | 3.612890359 |
| 204566_at   | PPM1D         | -2.3994526 | 0.01703643 | 9.23E-04 | 0.2775688 | 3.602710391 |
| 222870_s_at | B3GNT1        | -2.1935124 | 0.01720934 | 2.09E-03 | 0.2783309 | 3.592845782 |
| 229273_at   | SALL1         | -2.019187  | 0.01726353 | 3.44E-03 | 0.2783604 | 3.59246502  |
| 227443_at   | C9orf150      | -2.3524592 | 0.01703643 | 1.11E-03 | 0.2784837 | 3.590874439 |
| 227577_at   | EXOC8         | -2.5250527 | 0.01692722 | 6.24E-04 | 0.2785592 | 3.589901177 |
| 225256_at   | ---           | -2.3363621 | 0.01703643 | 1.19E-03 | 0.2786019 | 3.58935097  |
| 229218_at   | COL1A2        | -2.2427717 | 0.01710084 | 1.68E-03 | 0.2793298 | 3.579997551 |
| 218611_at   | IER5          | -2.2386431 | 0.01710084 | 1.72E-03 | 0.2797417 | 3.574726256 |
| 205135_s_at | NUFIP1        | -2.2259389 | 0.01715192 | 1.83E-03 | 0.279902  | 3.572679009 |
| 221821_s_at | FLJ20436      | -2.2975228 | 0.01703643 | 1.36E-03 | 0.2800215 | 3.571154358 |
| 213417_at   | TBX2          | -2.0588179 | 0.01726289 | 3.09E-03 | 0.2802344 | 3.568441276 |
| 222839_s_at | PAPOLG        | -2.3449977 | 0.01703643 | 1.15E-03 | 0.2802754 | 3.567919268 |
| 212367_at   | FEM1B         | -2.3793079 | 0.01703643 | 9.86E-04 | 0.2804277 | 3.565891535 |
| 227200_at   | ---           | -2.1172618 | 0.01726289 | 2.65E-03 | 0.2804355 | 3.565882351 |
| 202147_s_at | IFRD1         | -2.4703056 | 0.01703643 | 7.60E-04 | 0.2807772 | 3.561542746 |
| 203574_at   | NFIL3         | -2.7589862 | 0.01692722 | 1.81E-04 | 0.2809265 | 3.559649944 |
| 227798_at   | SMAD1         | -2.3525195 | 0.01703643 | 1.10E-03 | 0.2828054 | 3.536000373 |
| 201165_s_at | PUM1          | -2.564293  | 0.01692722 | 4.88E-04 | 0.2829862 | 3.533741221 |
| 213139_at   | SNAI2         | -2.4151995 | 0.01703643 | 8.77E-04 | 0.2836183 | 3.525865574 |
| 218259_at   | MKL2          | -2.0137327 | 0.01726353 | 3.50E-03 | 0.284061  | 3.520370625 |
| 32069_at    | N4BP1         | -2.9578983 | 0.01692722 | 8.14E-05 | 0.2874279 | 3.479133376 |
| 204794_at   | DUSP2         | -2.2494638 | 0.01710084 | 1.65E-03 | 0.2877709 | 3.474986526 |
| 213794_s_at | C14orf120     | -2.6923203 | 0.01692722 | 2.53E-04 | 0.2880505 | 3.471613484 |
| 222794_x_at | PAPD1         | -2.1471495 | 0.01726289 | 2.46E-03 | 0.2885668 | 3.465402118 |
| 227621_at   | WTAP          | -1.9634892 | 0.01726353 | 3.93E-03 | 0.2891706 | 3.458166217 |
| 202535_at   | FADD          | -2.2756275 | 0.01710084 | 1.48E-03 | 0.2898046 | 3.450600853 |
| 230270_at   | FLJ10330      | -2.2366466 | 0.01710084 | 1.76E-03 | 0.2903896 | 3.443649497 |
| 227624_at   | KIAA1546      | -1.9665243 | 0.01726353 | 3.90E-03 | 0.2905206 | 3.442096705 |
| 218875_s_at | FBXO5         | -2.3553104 | 0.01703643 | 1.09E-03 | 0.292477  | 3.419072269 |
| 223566_s_at | BCOR          | -2.2126143 | 0.01715192 | 1.92E-03 | 0.2927128 | 3.416317974 |
| 225005_at   | PHF13         | -2.1363994 | 0.01726289 | 2.53E-03 | 0.2935829 | 3.406192936 |
| 218726_at   | DKFZp762E1312 | -2.4177471 | 0.01703643 | 8.68E-04 | 0.2936554 | 3.405351987 |
| 239710_at   | ---           | -1.7841216 | 0.0174521  | 5.99E-03 | 0.2946169 | 3.394238416 |
| 227527_at   | MLL2          | -2.0508232 | 0.01726289 | 3.15E-03 | 0.2946892 | 3.393405663 |
| 213145_at   | FBXL14        | -2.4275645 | 0.01703643 | 8.41E-04 | 0.2951731 | 3.387842591 |
| 203846_at   | TRIM32        | -2.044362  | 0.01726289 | 3.24E-03 | 0.2973243 | 3.363330881 |
| 218428_s_at | REV1L         | -2.0364258 | 0.01726353 | 3.32E-03 | 0.2982271 | 3.353149328 |
| 214662_at   | WDR43         | -2.3172917 | 0.01703643 | 1.25E-03 | 0.2983893 | 3.351326606 |
| 226015_at   | ZNF12         | -1.8510762 | 0.01732618 | 5.07E-03 | 0.2992441 | 3.341753438 |
| 222811_at   | FLJ11171      | -2.1315147 | 0.01726289 | 2.56E-03 | 0.2995043 | 3.338850227 |
| 224569_s_at | IRF2BP2       | -2.2679787 | 0.01710084 | 1.56E-03 | 0.3007716 | 3.324781994 |
| 218472_s_at | PELO          | -2.2056632 | 0.01715192 | 1.99E-03 | 0.3012866 | 3.319098825 |
| 213848_at   | DUSP7         | -2.5383885 | 0.01692722 | 5.70E-04 | 0.3014734 | 3.317042233 |
| 222430_s_at | YTHDF2        | -2.0131287 | 0.01726353 | 3.51E-03 | 0.3015204 | 3.316525184 |
| 218311_at   | MAP4K3        | -1.9658758 | 0.01726353 | 3.91E-03 | 0.3015267 | 3.316455889 |
| 209291_at   | ID4           | -2.5200806 | 0.01692722 | 6.33E-04 | 0.3026603 | 3.304034259 |
| 222203_s_at | RDH14         | -2.3045308 | 0.01703643 | 1.30E-03 | 0.3027625 | 3.302918955 |
| 227517_s_at | GAS5          | -2.0178207 | 0.01726353 | 3.45E-03 | 0.3031817 | 3.298352111 |
| 216221_s_at | PUM2          | -2.2378538 | 0.01710084 | 1.75E-03 | 0.3031871 | 3.298293364 |
| 213090_s_at | TAF4          | -2.6342118 | 0.01692722 | 2.98E-04 | 0.3036104 | 3.293694814 |
| 229265_at   | DRPLA         | -2.1750523 | 0.01726289 | 2.24E-03 | 0.30392   | 3.290339563 |
| 227477_at   | ZMYND19       | -2.0016527 | 0.01726353 | 3.64E-03 | 0.3041506 | 3.287844903 |
| 211297_s_at | CDK7          | -2.1903054 | 0.01720934 | 2.12E-03 | 0.3043249 | 3.285961813 |
| 223474_at   | C14orf4       | -2.0092517 | 0.01726353 | 3.58E-03 | 0.3050779 | 3.277851329 |
| 201368_at   | ZFP3642       | -2.2716063 | 0.01710084 | 1.52E-03 | 0.3059885 | 3.268096677 |
| 222580_at   | ZNF644        | -1.353116  | 0.01861502 | 1.36E-02 | 0.3063503 | 3.264237052 |
| 204847_at   | ZBTB11        | -1.9397044 | 0.01726353 | 4.16E-03 | 0.3075908 | 3.251072529 |
| 226883_at   | KLHL11        | -2.0481035 | 0.01726289 | 3.18E-03 | 0.3079063 | 3.247741277 |
| 215111_s_at | TSC22D1       | -2.2568001 | 0.01710084 | 1.60E-03 | 0.3084479 | 3.242038607 |
| 201997_s_at | SPEN          | -2.25429   | 0.01710084 | 1.62E-03 | 0.308531  | 3.241165393 |
| 212723_at   | PTDSR         | -2.2407403 | 0.01710084 | 1.71E-03 | 0.3086955 | 3.239438217 |
| 203312_x_at | ARF6          | -2.1399654 | 0.01726289 | 2.49E-03 | 0.308744  | 3.23892934  |
| 226000_at   | DKFZp547A023  | -2.412483  | 0.01703643 | 9.04E-04 | 0.3088866 | 3.237434062 |
| 227013_at   | LATS2         | -2.1866746 | 0.01720934 | 2.16E-03 | 0.3094243 | 3.231808232 |
| 222843_at   | FIGL1         | -2.1216041 | 0.01726289 | 2.63E-03 | 0.3100151 | 3.225649331 |
| 40560_at    | TBX2          | -1.9416765 | 0.01726353 | 4.14E-03 | 0.3102468 | 3.223240336 |
| 222889_at   | DCLRE1B       | -2.238376  | 0.01710084 | 1.74E-03 | 0.3102963 | 3.222726149 |
| 203654_s_at | COIL          | -2.054619  | 0.01726289 | 3.10E-03 | 0.3105506 | 3.220087161 |
| 202150_s_at | NEDD9         | -2.578668  | 0.01692722 | 4.25E-04 | 0.3107427 | 3.218096515 |
| 227897_at   | RAP2B         | -2.3663373 | 0.01703643 | 1.07E-03 | 0.3114338 | 3.210955266 |
| 219166_at   | C14orf104     | -2.2273633 | 0.01715192 | 1.81E-03 | 0.3114812 | 3.210466635 |
| 228455_at   | SLC16A4       | -2.1673761 | 0.01726289 | 2.31E-03 | 0.3116801 | 3.208417862 |
| 204962_s_at | CENPA         | -2.4543175 | 0.01703643 | 8.14E-04 | 0.3117149 | 3.208059672 |
| 212373_at   | FEM1B         | -2.3717583 | 0.01703643 | 1.04E-03 | 0.3121338 | 3.203754287 |
| 207318_s_at | CDC2L5        | -2.7764198 | 0.01692722 | 1.72E-04 | 0.3123094 | 3.201952935 |
| 227304_at   | SHMT1         | -2.0086855 | 0.01726353 | 3.60E-03 | 0.312808  | 3.196849185 |
| 201289_at   | CYR61         | -2.1489738 | 0.01726289 | 2.42E-03 | 0.3128622 | 3.196295366 |
| 206893_at   | SALL1         | -2.3857663 | 0.01703643 | 9.59E-04 | 0.3130702 | 3.194171786 |
| 223145_s_at | C6orf166      | -2.2071663 | 0.01715192 | 1.95E-03 | 0.3136982 | 3.187772797 |
| 203064_s_at | FOXK2         | -2.2252586 | 0.01715192 | 1.84E-03 | 0.3139565 | 3.185154631 |

|             |                    |            |            |          |           |             |
|-------------|--------------------|------------|------------|----------|-----------|-------------|
| 202171_at   | ZNF161             | -2.1126736 | 0.01726289 | 2.67E-03 | 0.31429   | 3.181774794 |
| 204823_at   | NAV3               | -1.9449676 | 0.01726353 | 4.11E-03 | 0.3143563 | 3.181103735 |
| 202324_s_at | ACBD3              | -2.2022046 | 0.01715192 | 2.04E-03 | 0.3145329 | 3.179317648 |
| 207643_s_at | TNFRSF1A           | -2.3428661 | 0.01703643 | 1.18E-03 | 0.3155595 | 3.168974472 |
| 228487_s_at | RREB1              | -1.9595068 | 0.01726353 | 3.97E-03 | 0.3156372 | 3.16819437  |
| 203624_at   | DXYS155E           | -2.1186515 | 0.01726289 | 2.64E-03 | 0.3157255 | 3.167308311 |
| 232889_at   | LOC153561          | -1.9834047 | 0.01726353 | 3.78E-03 | 0.3160987 | 3.163568847 |
| 228073_at   | ---                | -2.2675346 | 0.01710084 | 1.56E-03 | 0.3161192 | 3.163363693 |
| 222700_at   | ARL6IP2            | -2.0095294 | 0.01726353 | 3.57E-03 | 0.3161616 | 3.162939459 |
| 223081_at   | MGC2941            | -2.0383935 | 0.01726353 | 3.31E-03 | 0.317087  | 3.153708604 |
| 209481_at   | SNRK               | -2.0685884 | 0.01726289 | 3.00E-03 | 0.3180165 | 3.144490931 |
| 217779_s_at | PNRC2              | -2.2038906 | 0.01715192 | 2.02E-03 | 0.3195378 | 3.129520201 |
| 208938_at   | PRCC               | -2.2023424 | 0.01715192 | 2.03E-03 | 0.3199616 | 3.125375045 |
| 201502_s_at | NFKBIA             | -2.3451706 | 0.01703643 | 1.14E-03 | 0.320136  | 3.123672439 |
| 227558_at   | CBX4               | -2.0143767 | 0.01726353 | 3.49E-03 | 0.3212282 | 3.113051718 |
| 204451_at   | FZD1               | -2.5753261 | 0.01692722 | 4.43E-04 | 0.321815  | 3.107375355 |
| 226191_at   | GSK3B              | -2.5452009 | 0.01692722 | 5.61E-04 | 0.3225376 | 3.100413719 |
| 201631_s_at | IER3               | -2.1286808 | 0.01726289 | 2.59E-03 | 0.3227982 | 3.097910707 |
| 202979_s_at | ZF                 | -3.230796  | 0.01692722 | 2.71E-05 | 0.3236719 | 3.089548398 |
| 206373_at   | ZIC1               | -2.224457  | 0.01715192 | 1.85E-03 | 0.3237874 | 3.088446308 |
| 227034_at   | C2orf26            | -2.0390201 | 0.01726353 | 3.27E-03 | 0.3240267 | 3.08616543  |
| 203659_s_at | RFP2               | -2.5158067 | 0.01692722 | 6.60E-04 | 0.324459  | 3.082053511 |
| 202653_s_at | ---                | -2.1738972 | 0.01726289 | 2.25E-03 | 0.3246019 | 3.080696693 |
| 227220_at   | NFXL1              | -2.0128708 | 0.01726353 | 3.52E-03 | 0.3249333 | 3.077554686 |
| 225731_at   | KIAA1223           | -2.084587  | 0.01726289 | 2.90E-03 | 0.3250443 | 3.076503726 |
| 212993_at   | ---                | -2.0333987 | 0.01726353 | 3.36E-03 | 0.3251561 | 3.075445917 |
| 203347_s_at | M96                | -1.7574091 | 0.01747098 | 6.27E-03 | 0.3255161 | 3.07204467  |
| 213165_at   | CAP350             | -1.4321996 | 0.01819389 | 1.14E-02 | 0.3255219 | 3.071989934 |
| 234295_at   | DBR1               | -2.0726851 | 0.01726289 | 2.98E-03 | 0.3258619 | 3.06878466  |
| 223144_s_at | C6orf166           | -2.260783  | 0.01710084 | 1.58E-03 | 0.3258623 | 3.068780893 |
| 202081_at   | IER2               | -2.0385144 | 0.01726353 | 3.29E-03 | 0.3261447 | 3.066123717 |
| 212180_at   | CRKL               | -2.1247902 | 0.01726289 | 2.61E-03 | 0.3274583 | 3.053823953 |
| 242138_at   | DLX1               | -1.9673648 | 0.01726353 | 3.88E-03 | 0.328418  | 3.044900097 |
| 212964_at   | HIC2               | -2.4135332 | 0.01703643 | 8.86E-04 | 0.3285095 | 3.044051998 |
| 209004_s_at | FBXL5              | -2.2831045 | 0.01710084 | 1.43E-03 | 0.3292386 | 3.037310935 |
| 227542_at   | SOCS6              | -2.1805342 | 0.01726289 | 2.23E-03 | 0.3315632 | 3.016016253 |
| 242068_at   | BIRC6              | -1.7843108 | 0.0174521  | 5.98E-03 | 0.3317982 | 3.013880124 |
| 230618_s_at | XTP2               | -1.5364532 | 0.01771137 | 9.23E-03 | 0.3325505 | 3.007062085 |
| 243529_at   | MARS2              | -2.1043139 | 0.01726289 | 2.72E-03 | 0.3326005 | 3.006610032 |
| 209049_s_at | PRKCBP1            | -2.1477777 | 0.01726289 | 2.44E-03 | 0.333084  | 3.00224568  |
| 212761_at   | TCF7L2             | -2.2591347 | 0.01710084 | 1.59E-03 | 0.333102  | 3.002083446 |
| 219900_at   | FLJ23311           | -2.0064392 | 0.01726353 | 3.62E-03 | 0.3331582 | 3.001577029 |
| 209654_at   | KIAA0947           | -1.6350579 | 0.01764668 | 7.79E-03 | 0.3338353 | 2.995489093 |
| 226284_at   | ZBTB2              | -2.1316303 | 0.01726289 | 2.55E-03 | 0.3343036 | 2.991292944 |
| 235022_at   | C18orf19           | -2.2537277 | 0.01710084 | 1.63E-03 | 0.3350227 | 2.984872368 |
| 221596_s_at | DKFZP56400523      | -2.7367772 | 0.01692722 | 1.99E-04 | 0.3352795 | 2.982586171 |
| 226649_at   | PANK1              | -2.3811001 | 0.01703643 | 9.77E-04 | 0.3358008 | 2.977955979 |
| 226194_at   | C13orf8            | -1.9596853 | 0.01726353 | 3.96E-03 | 0.3358092 | 2.977881487 |
| 222243_s_at | TOB2               | -2.1602854 | 0.01726289 | 2.36E-03 | 0.3362366 | 2.974096217 |
| 226298_at   | RUND1              | -2.0613657 | 0.01726289 | 3.05E-03 | 0.3362511 | 2.973967966 |
| 225478_at   | MFHAS1             | -2.2408383 | 0.01710084 | 1.70E-03 | 0.3363023 | 2.973515197 |
| 219330_at   | VANG1              | -2.1285652 | 0.01726289 | 2.60E-03 | 0.3380414 | 2.958217544 |
| 200664_s_at | DNAJB1             | -2.2224584 | 0.01715192 | 1.85E-03 | 0.3401262 | 2.94008518  |
| 218897_at   | MGC10993           | -2.3000274 | 0.01703643 | 1.32E-03 | 0.3404348 | 2.937420029 |
| 213038_at   | IBRD3              | -2.0254102 | 0.01726353 | 3.38E-03 | 0.3405938 | 2.936048748 |
| 204725_s_at | NCK1               | -2.2056725 | 0.01715192 | 1.98E-03 | 0.3407489 | 2.934712335 |
| 224492_s_at | ZNF627             | -2.1821185 | 0.01720934 | 2.20E-03 | 0.3414876 | 2.928364017 |
| 221741_s_at | YTHDF1             | -2.2365535 | 0.01710084 | 1.77E-03 | 0.3416423 | 2.927038016 |
| 225992_at   | MLLT10             | -1.8309215 | 0.01732618 | 5.29E-03 | 0.342099  | 2.923130439 |
| 225443_at   | ---                | -2.0390104 | 0.01726353 | 3.28E-03 | 0.3423606 | 2.920896856 |
| 227197_at   | SGEF               | -1.8905813 | 0.01727396 | 4.64E-03 | 0.3438291 | 2.908421655 |
| 203823_at   | RG53               | -2.3219379 | 0.01703643 | 1.23E-03 | 0.3441003 | 2.906129405 |
| 226117_at   | TIFA               | -2.0711132 | 0.01726289 | 2.99E-03 | 0.3447531 | 2.900626564 |
| 225091_at   | ZCCHC3             | -1.958462  | 0.01726353 | 3.98E-03 | 0.3451319 | 2.897442978 |
| 209572_s_at | EED                | -2.1495477 | 0.01726289 | 2.41E-03 | 0.3452779 | 2.8962178   |
| 225458_at   | DKFZP56411171      | -1.8805668 | 0.01727396 | 4.78E-03 | 0.3452816 | 2.896186765 |
| 213262_at   | SACS               | -0.858277  | 0.02650922 | 5.78E-02 | 0.3457194 | 2.892519193 |
| 217812_at   | YTHDF2             | -2.2192186 | 0.01715192 | 1.88E-03 | 0.3457712 | 2.892085865 |
| 218878_s_at | SIRT1              | -2.1052867 | 0.01726289 | 2.70E-03 | 0.3459595 | 2.890511751 |
| 223288_at   | USP38              | -2.0433204 | 0.01726289 | 3.25E-03 | 0.3464158 | 2.886704359 |
| 220559_at   | EN1                | -2.2040704 | 0.01715192 | 2.01E-03 | 0.3464861 | 2.886118664 |
| 207830_s_at | PPP1R8             | -2.3238323 | 0.01703643 | 1.22E-03 | 0.3469707 | 2.882087738 |
| 225806_at   | JUB                | -1.8879817 | 0.01727396 | 4.72E-03 | 0.3470672 | 2.881286391 |
| 203057_s_at | PRDM2              | -2.3676135 | 0.01703643 | 1.06E-03 | 0.3474304 | 2.878274325 |
| 225980_at   | C14orf43           | -2.3743347 | 0.01703643 | 1.02E-03 | 0.3475714 | 2.877106689 |
| 223228_at   | LDOC1L             | -2.3511091 | 0.01703643 | 1.12E-03 | 0.3476869 | 2.876150928 |
| 225567_at   | ---                | -1.8507323 | 0.01732618 | 5.08E-03 | 0.3478375 | 2.874905667 |
| 244439_at   | SPRED1             | -2.2982487 | 0.01703643 | 1.34E-03 | 0.3478457 | 2.874837895 |
| 244103_at   | FLJ35382           | -1.820629  | 0.01732618 | 5.46E-03 | 0.3484125 | 2.870161088 |
| 213360_s_at | POM121 /// LOC3403 | -2.0885303 | 0.01726289 | 2.87E-03 | 0.3491338 | 2.864231421 |
| 225227_at   | ---                | -1.7548546 | 0.01747098 | 6.30E-03 | 0.349149  | 2.864106728 |
| 213005_s_at | ANKRD15            | -2.2975487 | 0.01703643 | 1.35E-03 | 0.349354  | 2.862426078 |
| 203737_s_at | PPRC1              | -2.0466752 | 0.01726289 | 3.21E-03 | 0.3497657 | 2.859056791 |
| 218968_s_at | ZFP64              | -2.1303694 | 0.01726289 | 2.57E-03 | 0.3502431 | 2.855159745 |
| 226524_at   | MGC26717           | -1.9741407 | 0.01726353 | 3.84E-03 | 0.3505539 | 2.852628369 |
| 214182_at   | ARF6               | -2.2446278 | 0.01710084 | 1.67E-03 | 0.3509847 | 2.849127042 |
| 201549_x_at | JARID1B            | -2.4970232 | 0.01703643 | 7.15E-04 | 0.3511231 | 2.848004019 |
| 222815_at   | RNF12              | -2.3682438 | 0.01703643 | 1.05E-03 | 0.3513286 | 2.846338157 |
| 204695_at   | CDC25A             | -2.0239659 | 0.01726353 | 3.41E-03 | 0.3513905 | 2.845836754 |
| 212260_at   | TNRC15             | -2.0969766 | 0.01726289 | 2.80E-03 | 0.3517268 | 2.843115736 |
| 235542_at   | MGC22014           | -2.0157128 | 0.01726353 | 3.46E-03 | 0.3518765 | 2.84190618  |
| 206015_s_at | FOXJ3              | -1.9505403 | 0.01726353 | 4.04E-03 | 0.3518897 | 2.841799575 |
| 218303_x_at | LOC51315           | -2.1881097 | 0.01720934 | 2.13E-03 | 0.3520588 | 2.840434609 |
| 219062_s_at | ZCCHC2             | -2.2496701 | 0.01710084 | 1.64E-03 | 0.3528785 | 2.833836575 |
| 229238_at   | LOC400566          | -2.2266656 | 0.01715192 | 1.82E-03 | 0.3529253 | 2.833460792 |
| 226541_at   | FBXO30             | -2.1074793 | 0.01726289 | 2.70E-03 | 0.3540324 | 2.824600234 |
| 222415_at   | MLL3               | -1.8436413 | 0.01732618 | 5.16E-03 | 0.3540943 | 2.824106446 |
| 227538_at   | CRSP7              | -2.1945172 | 0.01715192 | 2.07E-03 | 0.354908  | 2.817631612 |
| 200816_s_at | PAFAH1B1           | -1.9267958 | 0.01727396 | 4.27E-03 | 0.3549714 | 2.817128366 |
| 218929_at   | CARF               | -2.3787908 | 0.01703643 | 9.95E-04 | 0.3551715 | 2.815541224 |

|             |                  |            |            |          |           |             |
|-------------|------------------|------------|------------|----------|-----------|-------------|
| 234863_x_at | FBXO5            | -1.88166   | 0.01727396 | 4.78E-03 | 0.3554103 | 2.813649464 |
| 202969_at   | DYRK2            | -2.285947  | 0.01703643 | 1.40E-03 | 0.3562745 | 2.806824513 |
| 220949_s_at | MGC5242          | -2.1709821 | 0.01726289 | 2.29E-03 | 0.3563358 | 2.806341659 |
| 208891_at   | DUSP6            | -2.1919064 | 0.01720934 | 2.11E-03 | 0.3564493 | 2.805448068 |
| 226566_at   | TRIM11           | -1.7736663 | 0.01746419 | 6.12E-03 | 0.3566842 | 2.803600496 |
| 200050_at   | ZNF146           | -1.1238175 | 0.02026854 | 2.33E-02 | 0.3569671 | 2.801378614 |
| 218604_at   | LEMD3            | -2.1734412 | 0.01726289 | 2.27E-03 | 0.3572239 | 2.799364768 |
| 210541_s_at | RFP              | -2.0353779 | 0.01726353 | 3.35E-03 | 0.3574919 | 2.797266176 |
| 225477_s_at | MRPS25           | -2.0481651 | 0.01726289 | 3.17E-03 | 0.3579616 | 2.793595738 |
| 215460_x_at | BRD1             | -2.2362678 | 0.01710084 | 1.78E-03 | 0.3584944 | 2.789443852 |
| 226795_at   | LRCH1            | -2.0512806 | 0.01726289 | 3.14E-03 | 0.3589325 | 2.786039158 |
| 203311_s_at | ARF6             | -2.0359569 | 0.01726353 | 3.33E-03 | 0.3589937 | 2.785564203 |
| 203097_s_at | RAPGEF2          | -2.0745166 | 0.01726289 | 2.98E-03 | 0.3590297 | 2.785284894 |
| 218398_at   | MRPS30           | -2.4862427 | 0.01703643 | 7.33E-04 | 0.359416  | 2.782291273 |
| 201830_s_at | NET1             | -2.5757848 | 0.01692722 | 4.34E-04 | 0.3597303 | 2.779860356 |
| 212099_at   | RHOB             | -1.7885712 | 0.0174521  | 5.94E-03 | 0.3599215 | 2.77838362  |
| 203600_s_at | C4orf8           | -2.2166224 | 0.01715192 | 1.90E-03 | 0.3605314 | 2.773683513 |
| 222662_at   | LOC286044        | -2.0646142 | 0.01726289 | 3.03E-03 | 0.3605416 | 2.773605043 |
| 218539_at   | FBXO34           | -2.3430272 | 0.01703643 | 1.17E-03 | 0.3607233 | 2.77220795  |
| 223650_s_at | NRBF2            | -1.7854128 | 0.0174521  | 5.97E-03 | 0.3610457 | 2.769732474 |
| 215933_s_at | HHEX             | -2.2868037 | 0.01703643 | 1.39E-03 | 0.36107   | 2.769546071 |
| 207941_s_at | RNPC2            | -1.8507167 | 0.01732618 | 5.09E-03 | 0.3613011 | 2.767774579 |
| 226337_at   | FLJ11752         | -1.6852633 | 0.01754276 | 7.21E-03 | 0.362266  | 2.760402577 |
| 227105_at   | CSPP             | -1.5192526 | 0.01774763 | 9.52E-03 | 0.3626959 | 2.757130698 |
| 222119_s_at | FBXO11           | -2.047878  | 0.01726289 | 3.19E-03 | 0.3627021 | 2.757083568 |
| 223085_at   | RNF19            | -2.2482214 | 0.01710084 | 1.66E-03 | 0.3629286 | 2.755362901 |
| 203990_s_at | UTX              | -2.6332902 | 0.01692722 | 3.08E-04 | 0.3633223 | 2.752377159 |
| 223282_at   | SDCCAG33         | -2.0896085 | 0.01726289 | 2.85E-03 | 0.3633309 | 2.752312011 |
| 225188_at   | RAPH1            | -2.0487474 | 0.01726289 | 3.17E-03 | 0.3633935 | 2.751837884 |
| 226447_at   | ASH1L            | -1.4369621 | 0.01817358 | 1.13E-02 | 0.3634646 | 2.751299576 |
| 201394_s_at | RBM5             | -1.9419894 | 0.01726353 | 4.12E-03 | 0.3635237 | 2.750852283 |
| 236115_at   | KIAA1467         | -2.0995029 | 0.01726289 | 2.78E-03 | 0.363643  | 2.749949813 |
| 222624_s_at | ZNF639           | -1.8162842 | 0.0173504  | 5.53E-03 | 0.3653703 | 2.736949336 |
| 202846_s_at | PIGC             | -2.2697791 | 0.01710084 | 1.53E-03 | 0.3653962 | 2.736755336 |
| 205541_s_at | GSPT2            | -1.9455432 | 0.01726353 | 4.10E-03 | 0.3656878 | 2.734573043 |
| 225402_at   | TP53RK           | -2.0151036 | 0.01726353 | 3.47E-03 | 0.3658393 | 2.733440612 |
| 226951_at   | ---              | -1.8129563 | 0.01737787 | 5.58E-03 | 0.3659113 | 2.732902755 |
| 210269_s_at | DXYS155E         | -1.7408864 | 0.01747098 | 6.48E-03 | 0.3662561 | 2.730329952 |
| 219571_s_at | ZNF12 /// ZNF325 | -1.5509406 | 0.01768701 | 8.99E-03 | 0.3664464 | 2.728912059 |
| 203100_s_at | CDYL             | -2.2697543 | 0.01710084 | 1.54E-03 | 0.3672451 | 2.722977107 |
| 221963_x_at | ---              | -2.1417681 | 0.01726289 | 2.47E-03 | 0.3679115 | 2.718044965 |
| 219376_at   | ZNF322B          | -2.0427163 | 0.01726289 | 3.26E-03 | 0.3679116 | 2.718044226 |
| 239377_at   | MGC11102         | -1.8397439 | 0.01732618 | 5.25E-03 | 0.3681065 | 2.716605113 |
| 213605_s_at | MGC22265         | -1.575664  | 0.01766633 | 8.69E-03 | 0.3687939 | 2.711541595 |
| 226513_at   | LOC145758        | -1.8546789 | 0.01730062 | 5.02E-03 | 0.3688844 | 2.710876361 |
| 225838_at   | EPC2             | -1.9513996 | 0.01726353 | 4.03E-03 | 0.3694342 | 2.706841976 |
| 209681_at   | SLC19A2          | -2.3275797 | 0.01703643 | 1.20E-03 | 0.3698129 | 2.704070085 |
| 205251_at   | PER2             | -2.2718056 | 0.01710084 | 1.51E-03 | 0.369922  | 2.703272582 |
| 212945_s_at | MGA              | -1.6891248 | 0.01754276 | 7.16E-03 | 0.3707791 | 2.697203646 |
| 225848_at   | FLJ31413         | -2.0824414 | 0.01726289 | 2.91E-03 | 0.3707832 | 2.696993823 |
| 210560_at   | GBX2             | -2.0992652 | 0.01726289 | 2.79E-03 | 0.3708155 | 2.6967589   |
| 228065_at   | BCL9L            | -1.866435  | 0.01727396 | 4.90E-03 | 0.3711214 | 2.694536074 |
| 227404_s_at | EGR1             | -1.7528513 | 0.01747098 | 6.32E-03 | 0.372229  | 2.686518245 |
| 225519_at   | PPP4R2           | -1.7779944 | 0.01746419 | 6.03E-03 | 0.3727631 | 2.682668966 |
| 205993_s_at | TBX2             | -1.8012544 | 0.01744848 | 5.75E-03 | 0.3732126 | 2.67943794  |
| 227305_s_at | SHMT1            | -1.8699554 | 0.01727396 | 4.86E-03 | 0.3739103 | 2.674438228 |
| 216511_s_at | TCF7L2           | -2.1292227 | 0.01726289 | 2.58E-03 | 0.3742067 | 2.67231987  |
| 208066_s_at | GTF2B            | -1.9876037 | 0.01726353 | 3.73E-03 | 0.3748141 | 2.667989278 |
| 223289_s_at | USP38            | -1.8263397 | 0.01732618 | 5.36E-03 | 0.3748866 | 2.667473311 |
| 219123_at   | ZNF232           | -2.2383773 | 0.01710084 | 1.73E-03 | 0.3751765 | 2.665412146 |
| 202600_s_at | NR1P1            | -1.2189549 | 0.01930567 | 1.81E-02 | 0.3753037 | 2.66450877  |
| 203068_at   | KLHL21           | -1.9318993 | 0.01727396 | 4.23E-03 | 0.3768146 | 2.653824984 |
| 214766_s_at | ELYS             | -0.9614288 | 0.02377444 | 3.94E-02 | 0.3768912 | 2.653285617 |
| 209815_at   | PTCH             | -2.2910272 | 0.01703643 | 1.38E-03 | 0.377148  | 2.651478995 |
| 202302_s_at | FLJ11021         | -1.3451502 | 0.01864307 | 1.38E-02 | 0.3776942 | 2.647644576 |
| 203098_at   | CDYL             | -1.9563996 | 0.01726353 | 3.99E-03 | 0.3777431 | 2.64730183  |
| 212232_at   | FNBP4            | -1.7870542 | 0.0174521  | 5.96E-03 | 0.3778182 | 2.646775619 |
| 208892_s_at | DUSP6            | -2.1737792 | 0.01726289 | 2.26E-03 | 0.3782916 | 2.643463402 |
| 227551_at   | C9orf77          | -2.3501986 | 0.01703643 | 1.13E-03 | 0.3785016 | 2.641996758 |
| 202068_s_at | LDLR             | -2.2804114 | 0.01710084 | 1.45E-03 | 0.3791037 | 2.637800686 |
| 226100_at   | MLL5             | -1.799188  | 0.0174521  | 5.78E-03 | 0.3795098 | 2.634978069 |
| 206860_s_at | FLJ20323         | -1.8124335 | 0.01743251 | 5.62E-03 | 0.3798049 | 2.632930749 |
| 229460_at   | ---              | -1.9353527 | 0.01727396 | 4.20E-03 | 0.380039  | 2.631308892 |
| 216199_s_at | MAP3K4           | -1.7426111 | 0.01747098 | 6.45E-03 | 0.3802963 | 2.629528607 |
| 205366_s_at | HOXB6            | -2.0527875 | 0.01726289 | 3.11E-03 | 0.3803466 | 2.629180858 |
| 228963_at   | ---              | -2.1517699 | 0.01726289 | 2.40E-03 | 0.380449  | 2.628473199 |
| 213034_at   | KIAA0999         | -2.1002173 | 0.01726289 | 2.73E-03 | 0.380821  | 2.625905609 |
| 213376_at   | ZBTB1            | -2.0666507 | 0.01726289 | 3.01E-03 | 0.381302  | 2.622593115 |
| 222789_at   | RSBN1            | -2.0995393 | 0.01726289 | 2.76E-03 | 0.3813911 | 2.621980429 |
| 233329_s_at | LOC51315         | -2.0775523 | 0.01726289 | 2.96E-03 | 0.3814508 | 2.621570069 |
| 231940_at   | ZNF529           | -2.0211033 | 0.01726353 | 3.42E-03 | 0.381547  | 2.620909089 |
| 222239_s_at | DDX26            | -1.9949408 | 0.01726353 | 3.66E-03 | 0.3818519 | 2.618816353 |
| 221803_s_at | NRBF2            | -2.2083667 | 0.01715192 | 1.94E-03 | 0.3818622 | 2.618745715 |
| 202985_s_at | BAG5             | -2.282644  | 0.01710084 | 1.44E-03 | 0.3820266 | 2.617618773 |
| 209839_at   | DNM3             | -1.5836197 | 0.01766633 | 8.59E-03 | 0.3822703 | 2.615950023 |
| 224705_s_at | TNRC6A           | -1.6115034 | 0.01765749 | 8.16E-03 | 0.3825279 | 2.614188403 |
| 203372_s_at | SOCS2            | -2.0244313 | 0.01726353 | 3.39E-03 | 0.3828034 | 2.612306996 |
| 208079_s_at | STK6             | -2.1046831 | 0.01726289 | 2.71E-03 | 0.3839139 | 2.604750701 |
| 226251_at   | ASXL2            | -1.9491903 | 0.01726353 | 4.05E-03 | 0.3839284 | 2.604652326 |
| 217741_s_at | ZA20D2           | -2.0863142 | 0.01726289 | 2.88E-03 | 0.3839739 | 2.604343681 |
| 209446_s_at | ---              | -2.1378847 | 0.01726289 | 2.51E-03 | 0.3841805 | 2.602943148 |
| 213578_at   | BMPR1A           | -1.9039614 | 0.01727396 | 4.46E-03 | 0.3844351 | 2.601219296 |
| 228785_at   | ZNF281           | -1.8844165 | 0.01727396 | 4.74E-03 | 0.3844577 | 2.601066385 |
| 219286_s_at | RBM15            | -2.0863008 | 0.01726289 | 2.89E-03 | 0.3847545 | 2.59905992  |
| 228662_at   | SOCS7            | -1.8978019 | 0.01727396 | 4.59E-03 | 0.3849697 | 2.597607032 |
| 203643_at   | ERF              | -2.1078832 | 0.01726289 | 2.69E-03 | 0.3852692 | 2.595587709 |
| 230791_at   | NFIB             | -1.1104793 | 0.02054142 | 2.44E-02 | 0.3853242 | 2.595217222 |
| 218229_s_at | POGK             | -2.114389  | 0.01726289 | 2.66E-03 | 0.3857255 | 2.592517218 |
| 205981_s_at | ING2             | -2.0384859 | 0.01726353 | 3.30E-03 | 0.385906  | 2.591304618 |
| 202706_s_at | UMPS             | -2.1389353 | 0.01726289 | 2.50E-03 | 0.3862973 | 2.588679755 |

|             |               |            |            |          |           |             |
|-------------|---------------|------------|------------|----------|-----------|-------------|
| 219053_s_at | VPS37C        | -2.0849466 | 0.01726289 | 2.89E-03 | 0.3864472 | 2.587675626 |
| 209141_at   | UBE2G1        | -2.3054684 | 0.01703643 | 1.29E-03 | 0.3864665 | 2.587546398 |
| 204593_s_at | FLJ20232      | -2.1922754 | 0.01720934 | 2.10E-03 | 0.3866032 | 2.586631461 |
| 235233_s_at | ---           | -1.9939624 | 0.01726353 | 3.69E-03 | 0.3868086 | 2.585257929 |
| 222471_s_at | KCMF1         | -1.9666787 | 0.01726353 | 3.89E-03 | 0.3872415 | 2.582367851 |
| 212116_at   | RFP           | -1.9792416 | 0.01726353 | 3.80E-03 | 0.3875161 | 2.580537944 |
| 240432_x_at | ---           | -1.8903092 | 0.01727396 | 4.66E-03 | 0.3876253 | 2.579810967 |
| 212612_at   | RCOR1         | -2.0527157 | 0.01726289 | 3.12E-03 | 0.3876542 | 2.579618639 |
| 217798_at   | CNOT2         | -1.946614  | 0.01726353 | 4.08E-03 | 0.3878829 | 2.578097668 |
| 204516_at   | ATXN7         | -1.7958173 | 0.0174521  | 5.82E-03 | 0.3881343 | 2.576427798 |
| 203693_s_at | E2F3          | -2.1875173 | 0.01720934 | 2.14E-03 | 0.3886364 | 2.573099174 |
| 202495_at   | TBCO          | -2.1485524 | 0.01726289 | 2.43E-03 | 0.3889314 | 2.571147508 |
| 227373_at   | LOC146517     | -1.8646595 | 0.01727396 | 4.93E-03 | 0.3890128 | 2.570609502 |
| 226661_at   | CDCA2         | -1.8274766 | 0.01732618 | 5.33E-03 | 0.3897345 | 2.565849315 |
| 216017_s_at | NAB2          | -1.8025133 | 0.01744848 | 5.73E-03 | 0.3897454 | 2.565777556 |
| 205562_at   | RPP38         | -2.2561937 | 0.01710084 | 1.61E-03 | 0.3902133 | 2.562700964 |
| 216593_s_at | PIGC          | -2.1386426 | 0.01726289 | 2.51E-03 | 0.3902866 | 2.562219661 |
| 223916_s_at | BCOR          | -1.8723985 | 0.01727396 | 4.84E-03 | 0.3904693 | 2.561020802 |
| 232065_x_at | dJ3834.3      | -1.7744673 | 0.01746419 | 6.09E-03 | 0.3904925 | 2.560868647 |
| 209101_at   | CTGF          | -1.9889836 | 0.01726353 | 3.71E-03 | 0.3906699 | 2.559705777 |
| 222201_s_at | CASPBAP2      | -1.2802291 | 0.01893406 | 1.57E-02 | 0.3909145 | 2.558104138 |
| 227697_at   | SOCS3         | -1.8435258 | 0.01732618 | 5.17E-03 | 0.3911403 | 2.556627379 |
| 209944_at   | ZNF410        | -2.149864  | 0.01726289 | 2.41E-03 | 0.3916612 | 2.553227126 |
| 232181_at   | LOC153346     | -1.9870681 | 0.01726353 | 3.74E-03 | 0.391886  | 2.551762502 |
| 227539_at   | GNA13         | -2.0073018 | 0.01726353 | 3.61E-03 | 0.3919833 | 2.551129091 |
| 202923_s_at | GCLC          | -2.0983901 | 0.01726289 | 2.79E-03 | 0.3920465 | 2.550717836 |
| 204234_s_at | ZNF195        | -1.1464465 | 0.02000566 | 2.17E-02 | 0.3922973 | 2.549087134 |
| 215685_s_at | DLX2          | -2.3214757 | 0.01703643 | 1.24E-03 | 0.392313  | 2.548985122 |
| 203288_at   | KIAA0355      | -2.1477296 | 0.01726289 | 2.45E-03 | 0.3930122 | 2.544450274 |
| 213410_at   | C10orf137     | -2.1550234 | 0.01726289 | 2.38E-03 | 0.3932332 | 2.543020274 |
| 209142_s_at | UBE2G1        | -2.1261561 | 0.01726289 | 2.60E-03 | 0.3940278 | 2.537891996 |
| 225878_at   | KIF1B         | -1.9393789 | 0.01726353 | 4.17E-03 | 0.3941398 | 2.537170821 |
| 227273_at   | ---           | -1.8894107 | 0.01727396 | 4.70E-03 | 0.3942104 | 2.536716434 |
| 223705_s_at | DKFZp761C169  | -1.4706991 | 0.0179658  | 1.04E-02 | 0.3942463 | 2.536485441 |
| 225457_s_at | DKFZP564I1171 | -1.9201784 | 0.01727396 | 4.31E-03 | 0.3951316 | 2.530802396 |
| 202775_s_at | SFRS8         | -1.8467794 | 0.01732618 | 5.15E-03 | 0.3951662 | 2.530580804 |
| 226732_at   | LOC155435     | -1.8896122 | 0.01727396 | 4.69E-03 | 0.3952376 | 2.530123652 |
| 211202_s_at | JARID1B       | -1.9241844 | 0.01727396 | 4.30E-03 | 0.3955886 | 2.52787871  |
| 228145_s_at | ZNF398        | -2.1696553 | 0.01726289 | 2.30E-03 | 0.3956722 | 2.527344605 |
| 228238_at   | GAS5          | -1.9336131 | 0.01727396 | 4.21E-03 | 0.3957676 | 2.526735387 |
| 206510_at   | SIX2          | -1.8230805 | 0.01732618 | 5.41E-03 | 0.3962144 | 2.523886058 |
| 225133_at   | KLF3          | -1.8648557 | 0.01727396 | 4.92E-03 | 0.3962371 | 2.523741467 |
| 202413_s_at | USP1          | -1.2928325 | 0.01886878 | 1.53E-02 | 0.3965574 | 2.521703037 |
| 204790_at   | SMAD7         | -1.791258  | 0.0174521  | 5.90E-03 | 0.3967306 | 2.520602142 |
| 224945_at   | BTBD7         | -1.851646  | 0.01732618 | 5.06E-03 | 0.3970505 | 2.518571315 |
| 226711_at   | HTLF          | -1.6313101 | 0.01764668 | 7.86E-03 | 0.3970597 | 2.518512959 |
| 225834_at   | MGC57827      | -1.7560747 | 0.01747098 | 6.29E-03 | 0.3970763 | 2.518407671 |
| 224917_at   | ---           | -2.1862569 | 0.01720934 | 2.17E-03 | 0.3970972 | 2.518275123 |
| 212051_at   | WIRE          | -1.9439462 | 0.01726353 | 4.12E-03 | 0.3972252 | 2.517463645 |
| 212696_s_at | RNF4          | -2.1610785 | 0.01726289 | 2.35E-03 | 0.397227  | 2.517452238 |
| 231975_s_at | ---           | -1.647291  | 0.01761431 | 7.63E-03 | 0.3972629 | 2.51722474  |
| 205527_s_at | GEMIN4        | -2.0995239 | 0.01726289 | 2.77E-03 | 0.397297  | 2.517008686 |
| 212655_at   | ZCCHC14       | -1.918859  | 0.01727396 | 4.34E-03 | 0.397565  | 2.515311962 |
| 227481_at   | CNKSR3        | -1.756811  | 0.01747098 | 6.28E-03 | 0.3977789 | 2.513959388 |
| 213387_at   | KIAA1240      | -1.3656739 | 0.01857399 | 1.32E-02 | 0.3980867 | 2.512015599 |
| 228778_at   | ANGPT2        | -1.9313018 | 0.01727396 | 4.24E-03 | 0.3981393 | 2.511683725 |
| 225117_at   | LOC284058     | -2.059124  | 0.01726289 | 3.08E-03 | 0.398165  | 2.511521605 |
| 228571_at   | RBAK          | -1.0802235 | 0.02098182 | 2.68E-02 | 0.3982827 | 2.510779404 |
| 210023_s_at | PCGF1         | -2.0501872 | 0.01726289 | 3.16E-03 | 0.3984759 | 2.509562059 |
| 200851_s_at | KIAA0174      | -1.9752738 | 0.01726353 | 3.82E-03 | 0.3986309 | 2.508586264 |
| 207338_s_at | ZNF200        | -1.9110313 | 0.01727396 | 4.39E-03 | 0.3991452 | 2.505353941 |
| 203026_at   | ZBTB5         | -1.8908319 | 0.01727396 | 4.63E-03 | 0.3993511 | 2.504062215 |
