# Supplementary material
Source: PubMed Central journal article supplement (PMC1420802)
Supplement: nar_34_6_1721__5.pdf [file nar_34_6_1721__5.pdf]

## Supplemental Document S5

## Excel Dataset 2 - SDK up-regulated genes

| Probe Set ID | Gene Symbl  | d.value  | q.value    | p.value  | fold change |
|--------------|-------------|----------|------------|----------|-------------|
| 203455_s_at  | SAT         | 2.80018  | 0.01692722 | 1.45E-04 | 4.860065    |
| 210592_s_at  | SAT         | 3.140654 | 0.01692722 | 3.62E-05 | 3.509365    |
| 234949_at    | MGC72104    | 2.509862 | 0.01692722 | 6.78E-04 | 2.909871    |
| 242201_at    | ---         | 2.84058  | 0.01692722 | 1.27E-04 | 2.889419    |
| 224559_at    | MALAT1      | 2.216324 | 0.01715192 | 1.91E-03 | 2.759927    |
| 204285_s_at  | PMAIP1      | 2.466977 | 0.01703643 | 7.69E-04 | 2.714638    |
| 210387_at    | HIST1H2BC   | 2.611419 | 0.01692722 | 3.80E-04 | 2.512163    |
| 233376_at    | ---         | 2.316806 | 0.01703643 | 1.26E-03 | 2.494877    |
| 237137_at    | ---         | 1.867491 | 0.01727396 | 4.88E-03 | 2.447524    |
| 209007_s_at  | NPD014      | 1.941848 | 0.01726353 | 4.13E-03 | 2.328359    |
| 237189_at    | ---         | 2.233639 | 0.01715192 | 1.80E-03 | 2.226893    |
| 242778_at    | LPXN        | 2.045418 | 0.01726289 | 3.22E-03 | 2.150492    |
| 204237_at    | GULP1       | 1.66486  | 0.01760262 | 7.42E-03 | 2.114148    |
| 221478_at    | BNIP3L      | 1.5153   | 0.01774763 | 9.57E-03 | 2.05884     |
| 235134_at    | ---         | 1.698718 | 0.01750708 | 7.02E-03 | 2.031698    |
| 233019_at    | CNOT7       | 1.614643 | 0.01765749 | 8.11E-03 | 2.016508    |
| 214472_at    | HIST1H3D    | 1.633639 | 0.01764668 | 7.82E-03 | 1.99319     |
| 219979_s_at  | HSPC138     | 1.479937 | 0.01787908 | 1.02E-02 | 1.977993    |
| 227345_at    | TNFRSF10C   | 1.976706 | 0.01726353 | 3.81E-03 | 1.97336     |
| 213931_at    | ID2 /// ID2 | 2.012452 | 0.01726353 | 3.54E-03 | 1.964878    |
| 237369_at    | ---         | 1.581083 | 0.01766633 | 8.61E-03 | 1.960666    |
| 238311_at    | KIAA0776    | 1.812474 | 0.01743251 | 5.61E-03 | 1.950329    |
| 202950_at    | CRYZ        | 1.607501 | 0.01765749 | 8.23E-03 | 1.93508     |
| 230099_at    | DKFZp667M   | 1.576814 | 0.01766633 | 8.67E-03 | 1.922683    |
| 232319_at    | GGPS1       | 1.687925 | 0.01754276 | 7.17E-03 | 1.915354    |
| 242214_at    | RPS27A ///  | 1.527636 | 0.01771137 | 9.35E-03 | 1.900467    |
| 234987_at    | SAMHD1      | 1.502675 | 0.01776051 | 9.79E-03 | 1.850869    |
| 235311_at    | FKBP14      | 1.472158 | 0.01795975 | 1.04E-02 | 1.84        |
| 219410_at    | TMEM45A     | 1.586413 | 0.01765749 | 8.53E-03 | 1.835848    |
| 218352_at    | RCBTB1      | 1.507525 | 0.01774893 | 9.71E-03 | 1.827174    |
| 240868_at    | DKFZp547F   | 1.595266 | 0.01765749 | 8.39E-03 | 1.806828    |
| 223000_s_at  | F11R        | 1.568031 | 0.01766633 | 8.76E-03 | 1.80194     |
| 205078_at    | PIGF        | 1.461589 | 0.01799567 | 1.07E-02 | 1.800744    |
| 222444_at    | ARMCX3      | 1.470629 | 0.0179658  | 1.05E-02 | 1.794654    |
| 226633_at    | RAB8B       | 1.475525 | 0.0179174  | 1.03E-02 | 1.788005    |
| 237510_at    | ---         | 1.499309 | 0.01778656 | 9.87E-03 | 1.768724    |
| 235983_at    | ALS2CR3     | 1.496851 | 0.01778656 | 9.90E-03 | 1.75607     |
| 209318_x_at  | PLAGL1      | 1.456013 | 0.01802855 | 1.08E-02 | 1.755757    |
| 223268_at    | PTD012      | 1.525263 | 0.0177268  | 9.42E-03 | 1.748772    |
| 227021_at    | AOF1        | 1.489048 | 0.01782658 | 9.99E-03 | 1.722182    |
| 224914_s_at  | CIP29       | 1.440795 | 0.01815511 | 1.12E-02 | 1.720592    |
| 215772_x_at  | SUCLG2      | 1.55019  | 0.01768701 | 9.03E-03 | 1.718207    |
| 209146_at    | SC4MOL      | 1.441776 | 0.01815511 | 1.12E-02 | 1.715896    |
| 224604_at    | LOC401152   | 1.558122 | 0.01767716 | 8.91E-03 | 1.705716    |
| 219109_at    | SPAG16      | 1.46604  | 0.01798231 | 1.06E-02 | 1.68322     |
| 225785_at    | C10orf74    | 1.477294 | 0.01789043 | 1.02E-02 | 1.659624    |
| 236241_at    | MED31       | 1.433092 | 0.01819389 | 1.14E-02 | 1.627454    |
| 211709_s_at  | CLEC11A     | 1.446545 | 0.01810991 | 1.10E-02 | 1.577466    |
