# Supplementary material
Source: PubMed Central journal article supplement (PMC1420802)

## Supplemental Document S1

### HPLC-profile of *S. argillaceus* M7W1 at harvesting point (UV-detector, 452 nm)

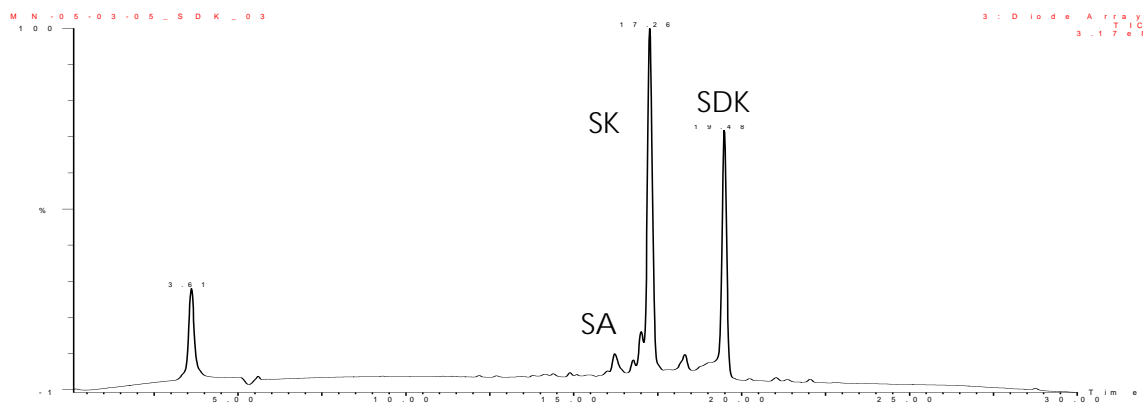

Supplement: nar_34_6_1721__1.pdf [file nar_34_6_1721__1.pdf]
